# Supplementary material
Source: HighWire-hosted journal article supplement (https://sti.bmj.com/content/99/5/324)
Supplement: inline-supplementary-material-1 [file inline-supplementary-material-1.pdf]

## Supplementary file

# Developing a symptom-based risk score for infectious syphilis among men who have sex with men

Nieuwenburg S.A.<sup>1</sup>, Hoornenborg E<sup>1</sup>, Davidovich U.<sup>1</sup>, de Vries H.J.C.<sup>1,2,3</sup>, Schim van der Loeff M.F.<sup>1,2,4</sup>

<sup>1</sup> Department of Infectious Diseases, Public Health Service Amsterdam, Amsterdam, the Netherlands

<sup>2</sup> Amsterdam UMC location University of Amsterdam, Amsterdam Institute for Infection and Immunity (AII), Meibergdreef 9, Amsterdam, the Netherlands

<sup>3</sup> Amsterdam UMC location University of Amsterdam, Department of Dermatology, Meibergdreef 9, Amsterdam, the Netherlands

<sup>4</sup> Amsterdam UMC location University of Amsterdam, Department of Internal Medicine, Division of Infectious Diseases, Meibergdreef 9, Amsterdam, the Netherlands

**Supplementary Table 1 Symptoms and risk factor assessed for the association with infectious syphilis among MSM. Amsterdam Centre for Sexual Health, 2018-2019. The table lists all symptoms and combinations of symptoms that were evaluated in the univariable analysis; the columns for each risk score indicate which factors were included in the multivariable model underpinning that risk score.**

| Coding  | Symptoms/risk factor                         | Included in Score A* | Included in Score B** | Included in Score C*** |
|---------|----------------------------------------------|----------------------|-----------------------|------------------------|
| 1.      | Ulcer <sup>a</sup>                           |                      |                       |                        |
| 1.a     | at the anus                                  |                      |                       |                        |
| 1.p     | on the penis                                 |                      |                       |                        |
| 1.m     | in the mouth                                 | x                    |                       |                        |
| 1.s     | on the skin <sup>b</sup>                     | x                    |                       |                        |
| 1.1     | Painless ulcer                               |                      |                       |                        |
| 1.1.a   | at the anus                                  |                      |                       |                        |
| 1.1.p   | on the penis                                 |                      |                       | x                      |
| 1.1.m   | in the mouth                                 |                      |                       |                        |
| 1.1.s   | on the skin                                  |                      |                       |                        |
| 1.1.1   | Painless ulcer with lymph nodes <sup>c</sup> |                      |                       |                        |
| 1.1.1.a | at the anus                                  | x                    | x                     | x                      |
| 1.1.1.p | on the penis                                 | x                    | x                     |                        |
| 1.1.1.m | in the mouth                                 |                      |                       |                        |
| 1.1.1.s | on the skin                                  |                      |                       |                        |
| 1.1.2   | Painless ulcer without lymph nodes           |                      |                       |                        |
| 1.1.2.a | at the anus                                  | x                    |                       |                        |
| 1.1.2.p | on the penis                                 | x                    | x                     |                        |
| 1.1.2.m | in the mouth                                 |                      |                       |                        |
| 1.1.2.s | on the skin                                  |                      |                       |                        |
| 1.2     | Painful ulcer                                |                      |                       |                        |
| 1.2.a   | at the anus                                  |                      |                       |                        |
| 1.2.p   | on the penis                                 |                      |                       | x                      |
| 1.2.m   | in the mouth                                 |                      |                       |                        |
| 1.2.s   | on the skin                                  |                      |                       |                        |

Supplementary file\_v9

2

|         |                                                |   |   |   |
|---------|------------------------------------------------|---|---|---|
| 1.2.1   | Painful ulcer with lymph nodes                 |   |   |   |
| 1.2.1.a | at the anus                                    | x |   |   |
| 1.2.1.p | on the penis                                   | x | x |   |
| 1.2.1.m | in the mouth                                   |   |   |   |
| 1.2.1.s | on the skin                                    |   |   |   |
| 1.2.2   | Painful ulcer without lymph nodes              |   |   |   |
| 1.2.2.a | at the anus                                    | x | x | x |
| 1.2.2.p | on the penis                                   | x | x |   |
| 1.2.2.m | in the mouth                                   |   |   |   |
| 1.2.2.s | on the skin                                    |   |   |   |
| 2.      | Rash <sup>d</sup>                              |   |   |   |
| 2.pa    | on the palms of the hands                      |   |   |   |
| 2.so    | on the soles of the feet                       |   |   |   |
| 2.tr    | on the trunk                                   |   |   |   |
| 2.paso  | on the palms of the hands or soles of the feet | x |   |   |
| 2.1     | Itching rash                                   | x | x | x |
| 2.1.1   | without flu-like symptoms                      |   |   |   |
| 2.1.2   | with flu-like symptoms                         |   |   |   |
| 2.2     | Non-itching rash                               | x | x | x |
| 2.2.1   | without flu-like symptoms                      |   |   |   |
| 2.2.2   | with flu-like symptoms                         |   |   |   |
| 3.      | Notified for syphilis                          | x | x | x |

\* Risk scores A1 and A2 contain the same set of symptoms and risk factor (partner notification for syphilis); in risk score A1 each factor has the same weight, and in risk score A2 each factor has a weight identical to the regression coefficient of that factor.

\*\* Risk scores B1 and B2 contain the same set of symptoms and risk factor (partner notification for syphilis); in risk score B1 each factor has the same weight, and in risk score B2 each factor has a weight identical to the regression coefficient of that factor.

\*\*\* Risk scores C1 and C2 contain the same set of symptoms and risk factor (partner notification for syphilis); in risk score C1 each factor has the same weight, and in risk score C2 each factor has a weight identical to the regression coefficient of that factor.

<sup>a</sup> Ulcer is defined as having an ulcer at the anus, on the penis, in the mouth or on the skin

<sup>b</sup> Skin is defined as location other than anogenital (anus or penis) or mouth

<sup>d</sup> Rash associated with syphilis: a maculopapular exanthema or erythematous exanthema

**Supplementary Table 2 Possible syphilis symptoms and risk factor and their association with a diagnosis of infectious syphilis among 21,646 consultations with MSM. Amsterdam STI outpatient clinic, 2018-2019.**

| Coding  |                                 | Symptoms/risk factor* | Number with infectious syphilis among all clients in the category; n/N (%) | Crude Odds ratio (95% CI) | $\beta^{**}$ |
|---------|---------------------------------|-----------------------|----------------------------------------------------------------------------|---------------------------|--------------|
| 1.      | Ulcer <sup>a</sup>              | No                    | 419/21,252 (2.0%)                                                          | Ref                       |              |
|         |                                 | Yes                   | 119/394 (30.2%)                                                            | 21.5 (17.0-27.2)          | 3.1          |
| 1.a     | at the anus                     | No                    | 517/21,532 (2.4%)                                                          | Ref                       |              |
|         |                                 | Yes                   | 21/114 (18.4%)                                                             | 9.2 (5.7-14.8)            | 2.2          |
| 1.p     | on the penis                    | No                    | 437/21,386 (2.0%)                                                          | Ref                       |              |
|         |                                 | Yes                   | 101/260 (38.9%)                                                            | 30.4 (23.3-39.7)          | 3.4          |
| 1.m     | in the mouth                    | No                    | 534/21,620 (2.5%)                                                          | Ref                       |              |
|         |                                 | Yes                   | 4/26 (15.4%)                                                               | 7.2 (2.5 -20.9)           | 2.0          |
| 1.s     | on the skin <sup>b</sup>        | No                    | 536/21.626 (2.5%)                                                          | Ref                       |              |
|         |                                 | Yes                   | 2/20 (10.0%)                                                               | 4.4 (1.0-18.9)            | 1.5          |
| 1.1     | Painless ulcer                  | No                    | 472/21,647 (2.20%)                                                         | Ref                       |              |
|         |                                 | Yes                   | 66/179 (36.9%)                                                             | 26.0 (18.9-35.6)          | 3.3          |
| 1.1.a   | at the anus                     | No                    | 533/21,614 (2.5%)                                                          | Ref                       |              |
|         |                                 | Yes                   | 5/32 (15.6%)                                                               | 7.3 (2.8-19.1)            | 2.0          |
| 1.1.p   | on the penis                    | No                    | 474/21,501 (2.2%)                                                          | Ref                       |              |
|         |                                 | Yes                   | 64/145 (44.1%)                                                             | 35.0 (24.9-49.2)          | 3.6          |
| 1.1.m   | in the mouth                    | No                    | 536/21,638 (2.5%)                                                          | Ref                       |              |
|         |                                 | Yes                   | 2/8 (25.0%)                                                                | 13.0 (2.6-64.8)           | 2.6          |
| 1.1.s   | on the skin                     | No                    | 537/21,638 (2.5%)                                                          | Ref                       |              |
|         |                                 | Yes                   | 1/8 (12.5%)                                                                | 5.6 (0.7-45.6)            | 1.7          |
| 1.1.1   | Painless ulcer with lymph nodes | No                    | 518/21,608 (2.4%)                                                          | Ref                       |              |
|         |                                 | Yes                   | 20/38 (52.6%)                                                              | 45.2 (23.8-86)            | 3.8          |
| 1.1.1.a | at anus                         | No                    | 536/21,643 (2.5%)                                                          | Ref                       |              |
|         |                                 | Yes                   | 2/3 (66.7%)                                                                | 78.6 (7.1-867.6)          | 4.4          |

Supplementary file\_v9

4

|         |                                    |     |                   |     |                   |                  |
|---------|------------------------------------|-----|-------------------|-----|-------------------|------------------|
| 1.1.1.p | on the penis                       | No  | 521/21,620 (2.4%) | Ref | 76.6 (34.0-172.6) | 4.3              |
|         |                                    | Yes | 17/26 (65.4%)     |     |                   |                  |
| 1.1.1.m | in the mouth                       | No  | 536/21,644 (2.5%) |     | N/A <sup>c</sup>  | N/A <sup>c</sup> |
|         |                                    | Yes | 0/2 (0.0)         |     |                   |                  |
| 1.1.1.s | on the skin                        | No  | 538/21,645 (2.5%) |     | N/A <sup>c</sup>  | N/A <sup>c</sup> |
|         |                                    | Yes | 0/1 (0.0)         |     |                   |                  |
| 1.1.2   | Painless ulcer without lymph nodes | No  | 490/21,497 (2.3%) | Ref | 20.4 (14.3-29.0)  | 3.0              |
|         |                                    | Yes | 48/149 (32.2%)    |     |                   |                  |
| 1.1.2.a | at the anus                        | No  | 535/21,617 (2.5%) | Ref | 4.6 (1.4-15.1)    | 1.5              |
|         |                                    | Yes | 3/29 (10.3%)      |     |                   |                  |
| 1.1.2.p | on the penis                       | No  | 491/21,527 (2.3%) | Ref | 27.9 (19.1-40.8)  | 3.3              |
|         |                                    | Yes | 47/119 (39.5%)    |     |                   |                  |
| 1.1.2.m | in the mouth                       | No  | 536/21,640 (2.5%) | Ref | 19.5 (3.6-107.1)  | 3.0              |
|         |                                    | Yes | 2/6 (33.3%)       |     |                   |                  |
| 1.1.2.s | on the skin                        | No  | 537/21,639 (2.5%) | Ref | 6.5 (0.8-54.3)    | 1.8              |
|         |                                    | Yes | 1/7 (14.3%)       |     |                   |                  |
| 1.2     | Painful ulcer                      | No  | 486/21,433 (2.3%) | Ref | 13.9 (10.1-19.3)  | 2.6              |
|         |                                    | Yes | 52/213 (24.4%)    |     |                   |                  |
| 1.2.a   | at the anus                        | No  | 523/21,565 (2.4%) | Ref | 9.1 (5.2-16.1)    | 2.2              |
|         |                                    | Yes | 15/81 (18.5%)     |     |                   |                  |
| 1.2.p   | on the penis                       | No  | 501/21,531 (2.3%) | Ref | 19.9 (13.3-29.7)  | 3.0              |
|         |                                    | Yes | 37/115 (32.2%)    |     |                   |                  |
| 1.2.m   | in the mouth                       | No  | 536/21,628 (2.5%) | Ref | 5.0 (1.1-21.5)    | 1.6              |
|         |                                    | Yes | 2/18 (11.1%)      |     |                   |                  |
| 1.2.s   | on the skin                        | No  | 538/21,635 (2.5%) |     | N/A <sup>c</sup>  | N/A <sup>c</sup> |
|         |                                    | Yes | 0/11(0.0%)        |     |                   |                  |
| 1.2.1   | Painful ulcer with lymph nodes     | No  | 528/21,599 (2.4%) | Ref | 10.8 (5.3-21.8)   | 2.4              |
|         |                                    | Yes | 10/47 (21.3%)     |     |                   |                  |
| 1.2.1.a | at the anus                        | No  | 536/21,631 (2.5%) | Ref | 6.1 (1.4-27.0)    | 1.8              |
|         |                                    | Yes | 2/15 (13.3%)      |     |                   |                  |
| 1.2.1.p | on the penis                       | No  | 532/21,621 (2.5%) | Ref |                   |                  |

Supplementary file\_v9

5

|         |                                                |     |                   |                   |                  |
|---------|------------------------------------------------|-----|-------------------|-------------------|------------------|
|         |                                                | Yes | 6/25 (24.0%)      | 12.5 (5.0-31.3)   | 2.5              |
| 1.2.1.m | in the mouth                                   | No  | 536/21,638 (2.5%) | Ref               |                  |
|         |                                                | Yes | 2/8 (25.0%)       | 13.1 (2.6-65.0)   | 2.6              |
| 1.2.1.s | on the skin                                    | No  | 538/21,645 (2.5%) |                   |                  |
|         |                                                | Yes | 0/1 (0.0%)        | N/A <sup>c</sup>  | N/A <sup>c</sup> |
| 1.2.2   | Painful ulcer without lymph nodes              | No  | 496/21,478 (2.3%) | Ref               |                  |
|         |                                                | Yes | 42/168 (25.0%)    | 14.1 (9.8-20.2)   | 2.6              |
| 1.2.2.a | at the anus                                    | No  | 525/21,580 (2.4%) | Ref               |                  |
|         |                                                | Yes | 13/66 (19.7%)     | 9.8 (5.3-18.1)    | 2.3              |
| 1.2.2.p | on the penis                                   | No  | 507/21,556 (2.4%) | Ref               |                  |
|         |                                                | Yes | 31/90 (34.4%)     | 21.8 (14.0-34)    | 3.1              |
| 1.2.2.m | in the mouth                                   | No  | 538/21,636 (2.5%) |                   |                  |
|         |                                                | Yes | 0/10 (0.0%)       | N/A <sup>c</sup>  | N/A <sup>c</sup> |
| 1.2.2.s | on the skin                                    | No  | 538/21,636 (2.5%) |                   |                  |
|         |                                                | Yes | 0/10 (0.0%)       | N/A <sup>c</sup>  | N/A <sup>c</sup> |
| 2.      | Rash <sup>d</sup>                              | No  | 471/21,498 (2.2%) | Ref               |                  |
|         |                                                | Yes | 67/148 (45.3%)    | 36.9 (26.4-51.7)  | 3.6              |
| 2.pa    | on the palms of the hand                       | No  | 524/21,624 (2.4%) | Ref               |                  |
|         |                                                | Yes | 14/22 (63.6%)     | 71.2 (29.7-170.6) | 4.3              |
| 2.so    | on the soles of the feet                       | No  | 536/21,634 (2.5%) | Ref               |                  |
|         |                                                | Yes | 2/3 (66.7%)       | 78.6 (7.1-867.6)  | 4.4              |
| 2.tr    | on the trunk                                   | No  | 477/21,509 (2.2%) | Ref               |                  |
|         |                                                | Yes | 61/137 (44.5%)    | 35.4 (24.9-50.1)  | 3.6              |
| 2.paso  | on the palms of the hands or soles of the feet | No  | 523/21,623 (2.4%) | Ref               |                  |
|         |                                                | Yes | 15/23 (65.2%)     | 76.4 (32.2-181.1) | 4.3              |
| 2.1     | Itching rash                                   | No  | 526/21,593 (2.4%) | Ref               |                  |
|         |                                                | Yes | 12/53 (22.6%)     | 11.7 (6.1-22.4)   | 2.5              |
| 2.1.1   | without flu-like symptoms                      | No  | 526/21,593 (2.4%) | Ref               |                  |
|         |                                                | Yes | 12/53 (22.6%)     | 11.7 (6.1-22.4)   | 2.5              |
| 2.1.2   | with flu-like symptoms                         | No  | 538/21,646 (2.5%) |                   |                  |
|         |                                                | Yes | 0/0 (0.0%)        | N/A <sup>c</sup>  | N/A <sup>c</sup> |

Supplementary file\_v9

6

|       |                                   |     |                   |                   |     |
|-------|-----------------------------------|-----|-------------------|-------------------|-----|
| 2.2   | Non-itching rash                  | No  | 492/21.566 (2.3%) | Ref               |     |
|       |                                   | Yes | 46/80 (57.5%)     | 57.8 (36.8-90.9)  | 4.1 |
| 2.2.1 | without flu-like symptoms         | No  | 507/21.588 (2.4%) | Ref               |     |
|       |                                   | Yes | 31/58 (53.5%)     | 47.7 (28.3-80.4)  | 3.9 |
| 2.2.2 | with flu-like symptoms            | No  | 523/21.624 (2.4%) | Ref               |     |
|       |                                   | Yes | 15/22 (68.2%)     | 86.8 (35.2-214.1) | 4.5 |
| 3.    | Having been notified for syphilis | No  | 442/20.818 (2.1%) | Ref               |     |
|       |                                   | Yes | 96/828 (11.6%)    | 6.1 (4.8-7.7)     | 1.8 |

<sup>a</sup> Ulcer is defined as having an ulcer at the anus, on the penis, in the mouth or on the skin. <sup>b</sup> Skin is defined as location other than anogenitalia (anus or penis) or mouth. <sup>c</sup> N/A= not applicable, because of the low numbers of observations. <sup>d</sup> Rash associated with syphilis: a maculopapular exanthema or erythematous exanthema

\* This table is built up hierarchically. For example, a man with a painless ulcer on the penis with palpable regional lymph nodes and no other symptoms will appear in the "Yes" row of all of the following variables: ulcer (at the anus, on the penis, in the mouth, or on the skin), ulcer on the penis, painless ulcer (at the anus, on the penis, in the mouth, or on the skin), painless ulcer on the penis, painless ulcer (at the anus, on the penis, in the mouth, or on the skin) with palpable regional lymph nodes, painless ulcer on the penis with palpable regional lymph nodes. He will appear in the "No" row of all other variables.

\*\*  $\beta$  is the regression coefficient of the logistic regression models (i.e. the log of the Odds Ratio).
